# Supplementary material for: Deciphering the physical mechanism of the topography effect for oxygen isotope measurements using a Cameca IMS-1280 SIMS
Source: Royal Society of Chemistry journal article supplement (doi:10.1039/c4ja00458b), 2015-01-01
Supplement: c4ja00458b1.pdf [file c4ja00458b1.pdf]

Table 1 Detail analytical data of session 1

| Sample          | Date            | IP(nA) | Intensity O <sup>16</sup> | O <sup>16</sup> /O <sup>18</sup> Mean | δO <sup>18</sup> | 2SE  | X position | Y position | DTFA_X | DTFA_Y | DTCA_X | DTCA_Y |
|-----------------|-----------------|--------|---------------------------|---------------------------------------|------------------|------|------------|------------|--------|--------|--------|--------|
| m257-1-center@1 | 2010/11/26 7:30 | 2.61   | 1.707E+9                  | 2.031E-3                              | 12.82            | 0.22 | 4636       | 538        | 14     | 18     | -46    | 0      |
| m257-1-center@2 | 2010/11/26 7:41 | 2.61   | 1.718E+9                  | 2.031E-3                              | 12.92            | 0.27 | 4713       | 555        | 12     | 18     | -50    | 0      |
| m257-1-center@3 | 2010/11/26 7:53 | 2.61   | 1.703E+9                  | 2.031E-3                              | 12.86            | 0.17 | 4791       | 568        | 12     | 19     | -49    | 0      |
| m257-1-center@4 | 2010/11/26 8:04 | 2.60   | 1.691E+9                  | 2.031E-3                              | 12.75            | 0.18 | 4747       | 471        | 10     | 17     | -48    | 0      |
| m257-1-center@5 | 2010/11/26 8:15 | 2.59   | 1.684E+9                  | 2.031E-3                              | 12.72            | 0.22 | 4903       | 481        | 10     | 19     | -54    | 0      |
| m257-1-center@6 | 2010/11/26 8:27 | 2.58   | 1.670E+9                  | 2.031E-3                              | 12.82            | 0.29 | 4798       | 381        | 13     | 19     | -48    | 0      |
| m257-1-center@7 | 2010/11/26 8:38 | 2.57   | 1.666E+9                  | 2.031E-3                              | 12.75            | 0.16 | 4916       | 398        | 11     | 19     | -54    | 0      |
| m257-1-rim@1    | 2010/11/26 7:22 | 2.60   | 1.709E+9                  | 2.031E-3                              | 12.69            | 0.30 | 4475       | 580        | 16     | 20     | -41    | 0      |
| m257-1-rim@2    | 2010/11/26 7:24 | 2.61   | 1.700E+9                  | 2.031E-3                              | 13.09            | 0.26 | 4415       | 668        | 16     | 21     | -42    | 0      |
| m257-1-rim@3    | 2010/11/26 7:27 | 2.61   | 1.704E+9                  | 2.031E-3                              | 13.09            | 0.23 | 4362       | 737        | 14     | 18     | -39    | 0      |
| m257-1-rim@4    | 2010/11/26 7:33 | 2.61   | 1.701E+9                  | 2.031E-3                              | 13.06            | 0.23 | 4303       | 823        | 18     | 22     | -40    | 0      |
| m257-1-rim@5    | 2010/11/26 7:36 | 2.61   | 1.703E+9                  | 2.032E-3                              | 13.22            | 0.33 | 4242       | 902        | 17     | 22     | -41    | 0      |
| m257-1-rim@6    | 2010/11/26 7:39 | 2.61   | 1.690E+9                  | 2.032E-3                              | 13.16            | 0.19 | 4178       | 985        | 19     | 22     | -38    | 0      |
| m257-1-rim@7    | 2010/11/26 7:44 | 2.61   | 1.687E+9                  | 2.031E-3                              | 13.02            | 0.20 | 4120       | 1056       | 19     | 25     | -39    | 0      |
| m257-1-rim@8    | 2010/11/26 7:47 | 2.60   | 1.636E+9                  | 2.031E-3                              | 13.02            | 0.23 | 4080       | 1152       | 20     | 26     | -43    | 0      |
| m257-1-rim@9    | 2010/11/26 7:50 | 2.59   | 1.626E+9                  | 2.032E-3                              | 13.18            | 0.23 | 4150       | 1198       | 16     | 23     | -46    | 0      |
| m257-1-rim@10   | 2010/11/26 7:56 | 2.59   | 1.600E+9                  | 2.031E-3                              | 12.92            | 0.27 | 4239       | 1259       | 19     | 29     | -44    | 0      |
| m257-1-rim@11   | 2010/11/26 7:58 | 2.58   | 1.599E+9                  | 2.032E-3                              | 13.23            | 0.30 | 4326       | 1320       | 19     | 24     | -46    | 0      |
| m257-1-rim@12   | 2010/11/26 8:01 | 2.58   | 1.574E+9                  | 2.030E-3                              | 12.51            | 0.25 | 4424       | 1338       | 19     | 27     | -53    | 0      |
| m257-1-rim@13   | 2010/11/26 8:07 | 2.58   | 1.574E+9                  | 2.030E-3                              | 12.32            | 0.30 | 4533       | 1291       | 17     | 27     | -53    | 0      |
| m257-1-rim@14   | 2010/11/26 8:10 | 2.58   | 1.564E+9                  | 2.030E-3                              | 12.50            | 0.21 | 4627       | 1220       | 16     | 27     | -56    | 0      |
| m257-1-rim@15   | 2010/11/26 8:12 | 2.57   | 1.556E+9                  | 2.029E-3                              | 12.07            | 0.25 | 4716       | 1168       | 16     | 26     | -54    | 0      |
| m257-1-rim@16   | 2010/11/26 8:18 | 2.58   | 1.578E+9                  | 2.030E-3                              | 12.15            | 0.19 | 4818       | 1122       | 15     | 27     | -58    | 0      |
| m257-1-rim@17   | 2010/11/26 8:21 | 2.59   | 1.594E+9                  | 2.027E-3                              | 10.95            | 0.14 | 4909       | 926        | 12     | 16     | -69    | 0      |
| m257-1-rim@18   | 2010/11/26 8:24 | 2.59   | 1.618E+9                  | 2.028E-3                              | 11.44            | 0.26 | 4906       | 801        | 13     | 22     | -66    | 0      |
| m257-1-rim@19   | 2010/11/26 8:29 | 2.58   | 1.618E+9                  | 2.029E-3                              | 11.85            | 0.13 | 4916       | 640        | 13     | 19     | -65    | 0      |
| m257-1-rim@20   | 2010/11/26 8:32 | 2.58   | 1.629E+9                  | 2.030E-3                              | 12.19            | 0.33 | 4999       | 506        | 11     | 15     | -63    | 0      |
| m257-1-rim@21   | 2010/11/26 8:35 | 2.57   | 1.630E+9                  | 2.030E-3                              | 12.19            | 0.17 | 5085       | 375        | 9      | 19     | -67    | 0      |
| m257-1-rim@22   | 2010/11/26 8:41 | 2.57   | 1.616E+9                  | 2.029E-3                              | 11.91            | 0.18 | 5273       | 206        | 4      | 9      | -70    | 0      |
| m257-1-rim@23   | 2010/11/26 8:43 | 2.57   | 1.583E+9                  | 2.028E-3                              | 11.47            | 0.29 | 5303       | 108        | 8      | 11     | -77    | 0      |
| m257-1-rim@24   | 2010/11/26 8:46 | 2.57   | 1.646E+9                  | 2.028E-3                              | 11.25            | 0.27 | 5308       | -8         | 6      | 9      | -72    | 0      |
| m257-2-center@1 | 2010/11/26 8:57 | 2.55   | 1.638E+9                  | 2.031E-3                              | 12.92            | 0.22 | 5694       | 1010       | 16     | 23     | -48    | 0      |
| m257-2-center@2 | 2010/11/26 9:09 | 2.53   | 1.634E+9                  | 2.031E-3                              | 12.92            | 0.19 | 5754       | 1010       | 15     | 19     | -49    | 0      |
| m257-2-center@3 | 2010/11/26 9:20 | 2.52   | 1.630E+9                  | 2.031E-3                              | 12.80            | 0.25 | 5607       | 941        | 15     | 21     | -50    | 0      |
| m257-2-center@4 | 2010/11/26 9:31 | 2.50   | 1.610E+9                  | 2.031E-3                              | 12.78            | 0.26 | 5686       | 939        | 15     | 21     | -50    | 0      |

|                 |                     |      |          |          |       |      |      |      |    |    |     |   |
|-----------------|---------------------|------|----------|----------|-------|------|------|------|----|----|-----|---|
| m257-2-center@5 | 2010/11/26 9:42     | 2.48 | 1.613E+9 | 2.030E-3 | 12.52 | 0.23 | 5757 | 942  | 13 | 20 | -50 | 0 |
| m257-2-center@6 | 2010/11/26 9:57     | 2.46 | 1.610E+9 | 2.031E-3 | 13.01 | 0.21 | 5602 | 884  | 11 | 19 | -52 | 0 |
| m257-2-rim@1    | 2010/11/26 8:49     | 2.71 | 1.692E+9 | 2.032E-3 | 13.17 | 0.16 | 5494 | 654  | 13 | 16 | -44 | 0 |
| m257-2-rim@2    | 2010/11/26 8:52     | 2.57 | 1.679E+9 | 2.032E-3 | 13.17 | 0.15 | 5410 | 756  | 16 | 17 | -42 | 0 |
| m257-2-rim@3    | 2010/11/26 8:55     | 2.55 | 1.643E+9 | 2.032E-3 | 13.27 | 0.19 | 5381 | 913  | 17 | 22 | -41 | 0 |
| m257-2-rim@4    | 2010/11/26 9:00     | 2.53 | 1.615E+9 | 2.032E-3 | 13.13 | 0.25 | 5357 | 1037 | 18 | 23 | -40 | 0 |
| m257-2-rim@5    | 2010/11/26 9:03     | 2.52 | 1.553E+9 | 2.031E-3 | 12.71 | 0.22 | 5399 | 1156 | 20 | 29 | -47 | 0 |
| m257-2-rim@6    | 2010/11/26 9:06     | 2.52 | 1.599E+9 | 2.031E-3 | 13.11 | 0.28 | 5508 | 1220 | 20 | 27 | -42 | 0 |
| m257-2-rim@7    | 2010/11/26 9:11     | 2.51 | 1.591E+9 | 2.032E-3 | 13.41 | 0.27 | 5512 | 1280 | 19 | 24 | -46 | 0 |
| m257-2-rim@8    | 2010/11/26 9:14     | 2.51 | 1.534E+9 | 2.030E-3 | 12.49 | 0.24 | 5599 | 1329 | 21 | 27 | -51 | 0 |
| m257-2-rim@9    | 2010/11/26 9:17     | 2.50 | 1.542E+9 | 2.031E-3 | 12.79 | 0.29 | 5708 | 1311 | 19 | 26 | -49 | 0 |
| m257-2-rim@10   | 2010/11/26 9:23     | 2.49 | 1.555E+9 | 2.031E-3 | 13.04 | 0.31 | 5814 | 1397 | 20 | 25 | -50 | 0 |
| m257-2-rim@11   | 2010/11/26 9:26     | 2.48 | 1.516E+9 | 2.031E-3 | 12.93 | 0.20 | 5943 | 1414 | 16 | 26 | -47 | 0 |
| m257-2-rim@12   | 2010/11/26 9:28     | 2.48 | 1.477E+9 | 2.030E-3 | 12.40 | 0.22 | 6066 | 1429 | 19 | 27 | -53 | 0 |
| m257-2-rim@13   | 2010/11/26 9:34     | 2.47 | 1.467E+9 | 2.029E-3 | 11.72 | 0.22 | 6233 | 1415 | 17 | 24 | -63 | 0 |
| m257-2-rim@14   | 2010/11/26 9:37     | 2.48 | 1.545E+9 | 2.029E-3 | 11.94 | 0.27 | 6365 | 1338 | 16 | 20 | -61 | 0 |
| m257-2-rim@15   | 2010/11/26 9:40     | 2.50 | 1.602E+9 | 2.028E-3 | 11.51 | 0.19 | 6287 | 1059 | 11 | 12 | -69 | 0 |
| m257-2-rim@16   | 2010/11/26 9:45     | 2.49 | 1.630E+9 | 2.029E-3 | 11.92 | 0.24 | 6244 | 963  | 11 | 10 | -66 | 0 |
| m257-2-rim@17   | 2010/11/26 9:48     | 2.48 | 1.661E+9 | 2.030E-3 | 12.12 | 0.26 | 6169 | 884  | 9  | 9  | -64 | 0 |
| m257-2-rim@18   | 2010/11/26 9:51     | 2.48 | 1.654E+9 | 2.030E-3 | 12.20 | 0.24 | 6056 | 770  | 10 | 10 | -63 | 0 |
| m257-2-rim@19   | 2010/11/26 9:54     | 2.48 | 1.669E+9 | 2.030E-3 | 12.40 | 0.27 | 5982 | 670  | 9  | 8  | -60 | 0 |
| m257-2-rim@20   | 2010/11/26 9:59     | 2.48 | 1.682E+9 | 2.031E-3 | 12.71 | 0.18 | 5784 | 592  | 11 | 9  | -51 | 0 |
| m257-2-rim@21   | 2010/11/26<br>10:02 | 2.47 | 1.652E+9 | 2.031E-3 | 12.83 | 0.23 | 5608 | 592  | 13 | 14 | -45 | 0 |

Table 2 Detail analytical data of session 2

| Sample      | Date            | IP(nA) | Intensity O <sup>16</sup> | O <sup>16</sup> /O <sup>18</sup> Mean | $\delta$ O <sup>18</sup> | 2SE  | X position | Y position | DTFA_X | DTFA_Y | DTCA_X | DTCA_Y |
|-------------|-----------------|--------|---------------------------|---------------------------------------|--------------------------|------|------------|------------|--------|--------|--------|--------|
| Penglai-C@1 | 2013-5-29 21:56 | 2.57   | 1.667E+9                  | 2.011E-3                              | 2.70                     | 0.25 | 1246       | 544        | 59     | -32    | 0      | 0      |
| Penglai-C@2 | 2013-5-29 22:00 | 2.58   | 1.672E+9                  | 2.011E-3                              | 2.67                     | 0.25 | 1176       | 544        | 59     | -30    | -1     | 0      |
| Penglai-C@3 | 2013-5-29 22:03 | 2.58   | 1.661E+9                  | 2.011E-3                              | 2.79                     | 0.30 | 1106       | 544        | 60     | -31    | -2     | 0      |
| Penglai-C@4 | 2013-5-29 22:07 | 2.58   | 1.662E+9                  | 2.011E-3                              | 2.87                     | 0.26 | 1036       | 544        | 59     | -33    | -1     | 0      |
| Penglai-C@5 | 2013-5-29 22:45 | 2.56   | 1.628E+9                  | 2.011E-3                              | 2.67                     | 0.22 | 966        | 544        | 60     | -33    | 0      | 0      |
| Penglai-C@6 | 2013-5-29 22:48 | 2.56   | 1.626E+9                  | 2.010E-3                              | 2.57                     | 0.23 | 966        | 614        | 61     | -31    | -1     | 0      |
| Penglai-C@7 | 2013-5-29 22:52 | 2.55   | 1.623E+9                  | 2.010E-3                              | 2.64                     | 0.29 | 1036       | 614        | 59     | -33    | 1      | 0      |
| Penglai-C@8 | 2013-5-29 22:55 | 2.55   | 1.606E+9                  | 2.010E-3                              | 2.32                     | 0.22 | 1106       | 614        | 61     | -31    | 1      | 0      |

|              |                 |      |          |          |      |      |      |      |    |     |    |   |
|--------------|-----------------|------|----------|----------|------|------|------|------|----|-----|----|---|
| Penglai-C@9  | 2013-5-29 23:33 | 2.53 | 1.636E+9 | 2.010E-3 | 2.55 | 0.29 | 1176 | 614  | 61 | -31 | 1  | 0 |
| Penglai-C@10 | 2013-5-29 23:37 | 2.53 | 1.654E+9 | 2.011E-3 | 2.68 | 0.31 | 1176 | 684  | 59 | -31 | -1 | 0 |
| Penglai-C@11 | 2013-5-29 23:40 | 2.52 | 1.605E+9 | 2.010E-3 | 2.41 | 0.22 | 1106 | 684  | 61 | -30 | -2 | 0 |
| Penglai-C@12 | 2013-5-30 0:14  | 2.50 | 1.642E+9 | 2.011E-3 | 2.77 | 0.39 | 1036 | 684  | 59 | -32 | 0  | 0 |
| Penglai-C@13 | 2013-5-30 0:18  | 2.50 | 1.639E+9 | 2.011E-3 | 3.03 | 0.34 | 966  | 684  | 60 | -29 | -3 | 0 |
| Penglai-C@14 | 2013-5-30 0:55  | 2.47 | 1.637E+9 | 2.011E-3 | 2.72 | 0.47 | 1176 | 754  | 57 | -32 | 0  | 0 |
| Penglai-C@15 | 2013-5-30 0:59  | 2.47 | 1.549E+9 | 2.010E-3 | 2.37 | 0.22 | 1246 | 754  | 60 | -29 | 1  | 0 |
| Penglai-T@1  | 2013-5-30 0:21  | 2.49 | 1.507E+9 | 2.009E-3 | 1.99 | 0.20 | 2184 | 2572 | 67 | -5  | -5 | 0 |
| Penglai-T@2  | 2013-5-30 0:25  | 2.49 | 1.538E+9 | 2.010E-3 | 2.31 | 0.30 | 2053 | 2580 | 69 | -4  | -5 | 0 |
| Penglai-T@3  | 2013-5-30 0:28  | 2.49 | 1.561E+9 | 2.010E-3 | 2.40 | 0.19 | 1906 | 2584 | 67 | -4  | -6 | 0 |
| Penglai-T@4  | 2013-5-30 0:32  | 2.48 | 1.520E+9 | 2.009E-3 | 2.12 | 0.18 | 1784 | 2591 | 70 | 1   | -5 | 0 |
| Penglai-T@5  | 2013-5-30 0:35  | 2.48 | 1.517E+9 | 2.010E-3 | 2.24 | 0.31 | 1661 | 2599 | 69 | -1  | -4 | 0 |
| Penglai-T@6  | 2013-5-30 0:38  | 2.48 | 1.546E+9 | 2.010E-3 | 2.38 | 0.18 | 1528 | 2605 | 70 | 2   | -2 | 0 |
| Penglai-T@7  | 2013-5-30 0:42  | 2.47 | 1.488E+9 | 2.009E-3 | 1.77 | 0.16 | 1349 | 2610 | 71 | 2   | -4 | 0 |
| Penglai-T@8  | 2013-5-30 0:45  | 2.47 | 1.527E+9 | 2.010E-3 | 2.27 | 0.27 | 1194 | 2612 | 71 | 1   | 2  | 0 |
| Penglai-T@9  | 2013-5-30 0:48  | 2.47 | 1.530E+9 | 2.010E-3 | 2.47 | 0.35 | 1067 | 2612 | 72 | 2   | 1  | 0 |
| Penglai-T@10 | 2013-5-30 0:52  | 2.46 | 1.576E+9 | 2.010E-3 | 2.55 | 0.39 | 944  | 2613 | 71 | 3   | 0  | 0 |
| Penglai-T@11 | 2013-5-30 1:57  | 2.41 | 1.447E+9 | 2.009E-3 | 1.85 | 0.23 | 785  | 2617 | 73 | 2   | 1  | 0 |
| Penglai-T@12 | 2013-5-30 2:00  | 2.41 | 1.459E+9 | 2.010E-3 | 2.27 | 0.22 | 450  | 2610 | 76 | 4   | 4  | 0 |
| Penglai-T@13 | 2013-5-30 2:04  | 2.40 | 1.549E+9 | 2.011E-3 | 2.84 | 0.28 | 310  | 2598 | 74 | 1   | 4  | 0 |
| Penglai-T@14 | 2013-5-30 2:08  | 2.40 | 1.450E+9 | 2.009E-3 | 1.98 | 0.22 | -56  | 2604 | 78 | -1  | 6  | 0 |
| Penglai-T@15 | 2013-5-30 2:11  | 2.40 | 1.513E+9 | 2.010E-3 | 2.51 | 0.36 | -178 | 2613 | 76 | 0   | 5  | 0 |
| Penglai-L@1  | 2013-5-29 22:10 | 2.55 | 1.562E+9 | 2.010E-3 | 2.55 | 0.22 | -568 | -426 | 81 | -40 | 24 | 0 |
| Penglai-L@2  | 2013-5-29 22:14 | 2.54 | 1.572E+9 | 2.010E-3 | 2.62 | 0.28 | -570 | -325 | 83 | -38 | 22 | 0 |
| Penglai-L@3  | 2013-5-29 22:17 | 2.55 | 1.646E+9 | 2.011E-3 | 3.09 | 0.38 | -565 | -230 | 83 | -38 | 22 | 0 |
| Penglai-L@4  | 2013-5-29 22:21 | 2.55 | 1.676E+9 | 2.012E-3 | 3.61 | 0.39 | -572 | -123 | 84 | -37 | 23 | 0 |
| Penglai-L@5  | 2013-5-29 22:24 | 2.56 | 1.600E+9 | 2.011E-3 | 2.88 | 0.23 | -569 | -25  | 83 | -37 | 23 | 0 |
| Penglai-L@6  | 2013-5-29 22:27 | 2.56 | 1.622E+9 | 2.011E-3 | 3.00 | 0.29 | -572 | 102  | 81 | -33 | 23 | 0 |
| Penglai-L@7  | 2013-5-29 22:31 | 2.56 | 1.666E+9 | 2.012E-3 | 3.55 | 0.37 | -571 | 216  | 82 | -32 | 23 | 0 |
| Penglai-L@8  | 2013-5-29 22:34 | 2.56 | 1.657E+9 | 2.012E-3 | 3.24 | 0.37 | -573 | 325  | 82 | -30 | 23 | 0 |
| Penglai-L@9  | 2013-5-29 22:38 | 2.56 | 1.580E+9 | 2.011E-3 | 2.66 | 0.28 | -572 | 426  | 82 | -28 | 22 | 0 |

|              |                 |      |          |          |      |      |      |       |    |     |     |   |
|--------------|-----------------|------|----------|----------|------|------|------|-------|----|-----|-----|---|
| Penglai-L@10 | 2013-5-29 22:41 | 2.55 | 1.652E+9 | 2.012E-3 | 3.28 | 0.28 | -561 | 759   | 83 | -24 | 22  | 0 |
| Penglai-L@11 | 2013-5-30 1:02  | 2.46 | 1.585E+9 | 2.012E-3 | 3.30 | 0.31 | -554 | 958   | 82 | -21 | 23  | 0 |
| Penglai-L@12 | 2013-5-30 1:06  | 2.46 | 1.598E+9 | 2.012E-3 | 3.64 | 0.32 | -555 | 1110  | 82 | -20 | 26  | 0 |
| Penglai-L@13 | 2013-5-30 1:09  | 2.46 | 1.617E+9 | 2.012E-3 | 3.57 | 0.23 | -548 | 1235  | 83 | -16 | 25  | 0 |
| Penglai-L@14 | 2013-5-30 1:12  | 2.45 | 1.615E+9 | 2.013E-3 | 3.74 | 0.37 | -545 | 1343  | 83 | -15 | 24  | 0 |
| Penglai-L@15 | 2013-5-30 1:16  | 2.45 | 1.508E+9 | 2.011E-3 | 2.92 | 0.31 | -542 | 1469  | 83 | -15 | 26  | 0 |
| Penglai-R@1  | 2013-5-29 22:58 | 2.55 | 1.592E+9 | 2.009E-3 | 1.65 | 0.28 | 2751 | -429  | 51 | -47 | -24 | 0 |
| Penglai-R@2  | 2013-5-29 23:02 | 2.55 | 1.603E+9 | 2.008E-3 | 1.63 | 0.26 | 2772 | -309  | 51 | -46 | -25 | 0 |
| Penglai-R@3  | 2013-5-29 23:05 | 2.55 | 1.619E+9 | 2.008E-3 | 1.53 | 0.16 | 2797 | -188  | 50 | -44 | -27 | 0 |
| Penglai-R@4  | 2013-5-29 23:09 | 2.55 | 1.619E+9 | 2.009E-3 | 1.90 | 0.20 | 2814 | -69   | 50 | -43 | -27 | 0 |
| Penglai-R@5  | 2013-5-29 23:12 | 2.54 | 1.601E+9 | 2.008E-3 | 1.35 | 0.21 | 2832 | 45    | 46 | -44 | -28 | 0 |
| Penglai-R@6  | 2013-5-29 23:16 | 2.54 | 1.586E+9 | 2.008E-3 | 1.55 | 0.17 | 2860 | 240   | 48 | -40 | -28 | 0 |
| Penglai-R@7  | 2013-5-29 23:19 | 2.54 | 1.602E+9 | 2.008E-3 | 1.53 | 0.24 | 2834 | 580   | 46 | -36 | -30 | 0 |
| Penglai-R@8  | 2013-5-29 23:23 | 2.54 | 1.592E+9 | 2.009E-3 | 1.70 | 0.18 | 2828 | 754   | 45 | -37 | -28 | 0 |
| Penglai-R@9  | 2013-5-29 23:26 | 2.53 | 1.587E+9 | 2.008E-3 | 1.31 | 0.19 | 2822 | 934   | 48 | -34 | -29 | 0 |
| Penglai-R@10 | 2013-5-29 23:30 | 2.53 | 1.589E+9 | 2.008E-3 | 1.42 | 0.18 | 2761 | 2140  | 58 | -18 | -26 | 0 |
| Penglai-R@11 | 2013-5-30 1:19  | 2.45 | 1.543E+9 | 2.009E-3 | 1.66 | 0.17 | 2822 | 1188  | 48 | -33 | -29 | 0 |
| Penglai-R@12 | 2013-5-30 1:23  | 2.45 | 1.549E+9 | 2.008E-3 | 1.59 | 0.19 | 2811 | 1334  | 48 | -29 | -30 | 0 |
| Penglai-R@13 | 2013-5-30 1:26  | 2.44 | 1.550E+9 | 2.008E-3 | 1.58 | 0.24 | 2790 | 1529  | 49 | -26 | -28 | 0 |
| Penglai-R@14 | 2013-5-30 1:30  | 2.44 | 1.554E+9 | 2.009E-3 | 1.92 | 0.26 | 2778 | 1708  | 50 | -28 | -27 | 0 |
| Penglai-R@15 | 2013-5-30 1:33  | 2.44 | 1.532E+9 | 2.009E-3 | 1.68 | 0.18 | 2776 | 1976  | 53 | -23 | -26 | 0 |
| Penglai-B@1  | 2013-5-29 23:44 | 2.52 | 1.653E+9 | 2.010E-3 | 2.56 | 0.35 | 1604 | -945  | 64 | -56 | -3  | 0 |
| Penglai-B@2  | 2013-5-29 23:47 | 2.52 | 1.606E+9 | 2.010E-3 | 2.18 | 0.17 | 1516 | -958  | 64 | -57 | -4  | 0 |
| Penglai-B@3  | 2013-5-29 23:50 | 2.55 | 1.635E+9 | 2.010E-3 | 2.60 | 0.30 | 1342 | -1008 | 65 | -58 | -2  | 0 |
| Penglai-B@4  | 2013-5-29 23:54 | 2.51 | 1.576E+9 | 2.010E-3 | 2.33 | 0.28 | 1211 | -1018 | 67 | -56 | -2  | 0 |
| Penglai-B@5  | 2013-5-29 23:57 | 2.51 | 1.593E+9 | 2.010E-3 | 2.29 | 0.30 | 1052 | -1022 | 67 | -57 | -1  | 0 |
| Penglai-B@6  | 2013-5-30 0:01  | 2.51 | 1.611E+9 | 2.010E-3 | 2.47 | 0.30 | 810  | -1002 | 70 | -55 | 3   | 0 |
| Penglai-B@7  | 2013-5-30 0:04  | 2.51 | 1.602E+9 | 2.010E-3 | 2.51 | 0.21 | 702  | -988  | 70 | -57 | 3   | 0 |
| Penglai-B@8  | 2013-5-30 0:07  | 2.51 | 1.598E+9 | 2.011E-3 | 2.68 | 0.28 | 586  | -977  | 69 | -56 | 2   | 0 |
| Penglai-B@9  | 2013-5-30 0:11  | 2.50 | 1.610E+9 | 2.011E-3 | 2.96 | 0.45 | 474  | -952  | 71 | -53 | 3   | 0 |

|                |                |      |          |          |      |      |      |      |    |     |     |   |
|----------------|----------------|------|----------|----------|------|------|------|------|----|-----|-----|---|
| Penglai-B@10   | 2013-5-30 1:37 | 2.44 | 1.590E+9 | 2.010E-3 | 2.64 | 0.35 | 2215 | -893 | 60 | -51 | -9  | 0 |
| Penglai-B@11   | 2013-5-30 1:40 | 2.43 | 1.508E+9 | 2.009E-3 | 1.91 | 0.21 | 2118 | -916 | 61 | -51 | -7  | 0 |
| Penglai-B@12   | 2013-5-30 1:43 | 2.42 | 1.569E+9 | 2.010E-3 | 2.43 | 0.35 | 2013 | -920 | 61 | -53 | -8  | 0 |
| Penglai-B@13   | 2013-5-30 1:47 | 2.43 | 1.558E+9 | 2.010E-3 | 2.64 | 0.35 | 1896 | -942 | 59 | -56 | -6  | 0 |
| Penglai-B@14   | 2013-5-30 1:50 | 2.42 | 1.607E+9 | 2.011E-3 | 2.77 | 0.35 | 1706 | -935 | 62 | -55 | -4  | 0 |
| Penglai-B@15   | 2013-5-30 1:54 | 2.42 | 1.598E+9 | 2.011E-3 | 2.77 | 0.36 | 138  | -878 | 73 | -53 | 8   | 0 |
| Penglai-R-L@1  | 2013-5-30 2:15 | 2.40 | 1.540E+9 | 2.010E-3 | 2.34 | 0.36 | 2655 | 1005 | 43 | -30 | -22 | 0 |
| Penglai-R-L@2  | 2013-5-30 2:18 | 2.40 | 1.529E+9 | 2.009E-3 | 2.07 | 0.35 | 2505 | 1005 | 47 | -30 | -18 | 0 |
| Penglai-R-L@3  | 2013-5-30 2:21 | 2.40 | 1.575E+9 | 2.010E-3 | 2.62 | 0.34 | 2355 | 1005 | 44 | -30 | -15 | 0 |
| Penglai-R-L@4  | 2013-5-30 2:25 | 2.39 | 1.541E+9 | 2.010E-3 | 2.22 | 0.35 | 2205 | 1005 | 47 | -28 | -14 | 0 |
| Penglai-R-L@5  | 2013-5-30 2:28 | 2.39 | 1.589E+9 | 2.011E-3 | 2.91 | 0.43 | 2055 | 1005 | 48 | -26 | -13 | 0 |
| Penglai-R-L@6  | 2013-5-30 2:32 | 2.39 | 1.551E+9 | 2.010E-3 | 2.53 | 0.35 | 1905 | 1005 | 50 | -27 | -10 | 0 |
| Penglai-R-L@7  | 2013-5-30 2:35 | 2.38 | 1.595E+9 | 2.011E-3 | 2.74 | 0.28 | 1755 | 1005 | 52 | -25 | -8  | 0 |
| Penglai-R-L@8  | 2013-5-30 2:39 | 2.38 | 1.584E+9 | 2.011E-3 | 3.02 | 0.39 | 1605 | 1005 | 52 | -28 | -5  | 0 |
| Penglai-R-L@9  | 2013-5-30 2:42 | 2.38 | 1.564E+9 | 2.011E-3 | 2.87 | 0.37 | 1455 | 1005 | 53 | -27 | -5  | 0 |
| Penglai-R-L@10 | 2013-5-30 2:46 | 2.37 | 1.581E+9 | 2.011E-3 | 3.06 | 0.40 | 1305 | 1005 | 57 | -26 | -2  | 0 |
| Penglai-R-L@11 | 2013-5-30 2:49 | 2.37 | 1.527E+9 | 2.010E-3 | 2.55 | 0.35 | 1155 | 1005 | 57 | -24 | -3  | 0 |
| Penglai-R-L@12 | 2013-5-30 2:53 | 2.37 | 1.573E+9 | 2.011E-3 | 3.04 | 0.38 | 1005 | 1005 | 59 | -25 | -1  | 0 |
| Penglai-R-L@13 | 2013-5-30 2:56 | 2.36 | 1.558E+9 | 2.011E-3 | 2.93 | 0.34 | 855  | 1005 | 60 | -26 | 1   | 0 |
| Penglai-R-L@14 | 2013-5-30 3:00 | 2.36 | 1.566E+9 | 2.011E-3 | 2.87 | 0.47 | 705  | 1005 | 61 | -24 | 1   | 0 |
| Penglai-R-L@15 | 2013-5-30 3:03 | 2.36 | 1.593E+9 | 2.012E-3 | 3.18 | 0.38 | 555  | 1005 | 62 | -26 | 3   | 0 |
| Penglai-R-L@16 | 2013-5-30 3:06 | 2.35 | 1.582E+9 | 2.012E-3 | 3.19 | 0.35 | 405  | 1005 | 65 | -24 | 4   | 0 |
| Penglai-R-L@17 | 2013-5-30 3:10 | 2.35 | 1.599E+9 | 2.012E-3 | 3.53 | 0.36 | 255  | 1005 | 65 | -24 | 5   | 0 |
| Penglai-R-L@18 | 2013-5-30 3:13 | 2.34 | 1.547E+9 | 2.011E-3 | 3.09 | 0.38 | 105  | 1005 | 69 | -23 | 7   | 0 |
| Penglai-R-L@19 | 2013-5-30 3:17 | 2.34 | 1.549E+9 | 2.012E-3 | 3.29 | 0.37 | -45  | 1005 | 72 | -20 | 9   | 0 |
| Penglai-R-L@20 | 2013-5-30 3:20 | 2.34 | 1.546E+9 | 2.012E-3 | 3.19 | 0.39 | -195 | 1005 | 73 | -21 | 11  | 0 |
| Penglai-R-L@21 | 2013-5-30 3:24 | 2.33 | 1.502E+9 | 2.011E-3 | 2.93 | 0.19 | -345 | 1000 | 75 | -21 | 14  | 0 |

Table 3 Detail analytical data of session 3

| Sample      | Date            | IP(nA) | Intensity O <sup>16</sup> | O <sup>16</sup> /O <sup>18</sup> Mean | δO <sup>18</sup> | 2SE  | X position | Y position | DTFA X | DTFA Y | DTCA X | DTCA Y |
|-------------|-----------------|--------|---------------------------|---------------------------------------|------------------|------|------------|------------|--------|--------|--------|--------|
| Penglai-C@1 | 2013-6-10 18:56 | 2.15   | 2.141E+9                  | 2.014E-3                              | 4.19             | 0.18 | 378        | 987        | 36     | 13     | 67     | 0      |

|              |                 |      |          |          |      |      |      |      |    |    |    |   |
|--------------|-----------------|------|----------|----------|------|------|------|------|----|----|----|---|
| Penglai-C@2  | 2013-6-10 18:59 | 2.15 | 2.151E+9 | 2.013E-3 | 4.06 | 0.19 | 478  | 987  | 34 | 11 | 66 | 0 |
| Penglai-C@3  | 2013-6-10 19:02 | 2.15 | 2.145E+9 | 2.014E-3 | 4.30 | 0.20 | 578  | 987  | 28 | 13 | 67 | 0 |
| Penglai-C@4  | 2013-6-10 19:23 | 2.12 | 2.116E+9 | 2.014E-3 | 4.37 | 0.12 | 678  | 987  | 32 | 10 | 67 | 0 |
| Penglai-C@5  | 2013-6-10 19:26 | 2.11 | 2.114E+9 | 2.014E-3 | 4.32 | 0.16 | 778  | 987  | 31 | 11 | 66 | 0 |
| Penglai-C@6  | 2013-6-10 19:53 | 2.19 | 2.141E+9 | 2.014E-3 | 4.37 | 0.23 | 778  | 887  | 31 | 12 | 64 | 0 |
| Penglai-C@7  | 2013-6-10 19:56 | 2.11 | 2.092E+9 | 2.014E-3 | 4.41 | 0.22 | 678  | 887  | 31 | 11 | 65 | 0 |
| Penglai-C@8  | 2013-6-10 20:20 | 2.17 | 2.179E+9 | 2.014E-3 | 4.57 | 0.14 | 578  | 887  | 31 | 12 | 65 | 0 |
| Penglai-C@9  | 2013-6-10 20:24 | 2.17 | 2.174E+9 | 2.014E-3 | 4.36 | 0.17 | 478  | 887  | 32 | 12 | 66 | 0 |
| Penglai-C@10 | 2013-6-10 20:51 | 2.11 | 2.122E+9 | 2.014E-3 | 4.38 | 0.16 | 378  | 887  | 32 | 13 | 65 | 0 |
| Penglai-C@11 | 2013-6-10 20:54 | 2.10 | 2.117E+9 | 2.014E-3 | 4.32 | 0.19 | 278  | 887  | 33 | 13 | 66 | 0 |
| Penglai-C@12 | 2013-6-10 21:15 | 2.05 | 2.071E+9 | 2.014E-3 | 4.33 | 0.20 | 278  | 787  | 32 | 12 | 66 | 0 |
| Penglai-C@13 | 2013-6-10 21:18 | 2.05 | 2.063E+9 | 2.014E-3 | 4.52 | 0.22 | 378  | 787  | 32 | 14 | 68 | 0 |
| Penglai-C@14 | 2013-6-10 21:36 | 2.01 | 2.024E+9 | 2.014E-3 | 4.46 | 0.13 | 478  | 787  | 32 | 14 | 68 | 0 |
| Penglai-C@15 | 2013-6-10 21:39 | 2.00 | 2.016E+9 | 2.014E-3 | 4.42 | 0.16 | 578  | 787  | 30 | 13 | 67 | 0 |
| Penglai-C@16 | 2013-6-10 22:19 | 2.12 | 2.125E+9 | 2.014E-3 | 4.54 | 0.20 | 687  | 787  | 29 | 14 | 66 | 0 |
| Penglai-C@17 | 2013-6-10 22:22 | 2.12 | 2.118E+9 | 2.014E-3 | 4.42 | 0.16 | 787  | 787  | 28 | 14 | 66 | 0 |
| Penglai-C@18 | 2013-6-10 22:48 | 2.06 | 2.077E+9 | 2.015E-3 | 4.66 | 0.13 | 787  | 687  | 27 | 15 | 64 | 0 |
| Penglai-C@19 | 2013-6-10 22:51 | 2.06 | 2.078E+9 | 2.015E-3 | 4.67 | 0.13 | 687  | 687  | 27 | 14 | 65 | 0 |
| Penglai-C@20 | 2013-6-10 23:19 | 2.00 | 2.028E+9 | 2.014E-3 | 4.40 | 0.22 | 587  | 687  | 27 | 13 | 66 | 0 |
| Penglai-C@21 | 2013-6-10 23:22 | 2.00 | 2.019E+9 | 2.014E-3 | 4.55 | 0.18 | 487  | 687  | 28 | 13 | 67 | 0 |
| Penglai-T@1  | 2013-6-10 19:14 | 2.15 | 2.078E+9 | 2.013E-3 | 4.08 | 0.23 | 1044 | 2634 | 39 | 32 | 64 | 0 |
| Penglai-T@2  | 2013-6-10 19:17 | 2.14 | 2.076E+9 | 2.014E-3 | 4.38 | 0.20 | 1135 | 2634 | 39 | 31 | 65 | 0 |
| Penglai-T@3  | 2013-6-10 19:20 | 2.13 | 2.060E+9 | 2.014E-3 | 4.34 | 0.14 | 1216 | 2641 | 39 | 33 | 66 | 0 |
| Penglai-T@4  | 2013-6-10 19:44 | 2.09 | 2.027E+9 | 2.014E-3 | 4.45 | 0.20 | 1317 | 2643 | 38 | 30 | 66 | 0 |
| Penglai-T@5  | 2013-6-10 19:47 | 2.09 | 2.120E+9 | 2.014E-3 | 4.22 | 0.14 | 1405 | 2643 | 37 | 32 | 65 | 0 |
| Penglai-T@6  | 2013-6-10 21:09 | 2.09 | 2.038E+9 | 2.014E-3 | 4.36 | 0.18 | 2037 | 2648 | 33 | 30 | 62 | 0 |
| Penglai-T@7  | 2013-6-10 21:12 | 2.08 | 2.026E+9 | 2.014E-3 | 4.29 | 0.22 | 1933 | 2644 | 33 | 30 | 62 | 0 |
| Penglai-T@8  | 2013-6-10 21:21 | 2.06 | 2.015E+9 | 2.014E-3 | 4.41 | 0.18 | 1848 | 2646 | 34 | 32 | 61 | 0 |
| Penglai-T@9  | 2013-6-10 21:24 | 2.05 | 2.007E+9 | 2.014E-3 | 4.37 | 0.13 | 1752 | 2649 | 34 | 32 | 62 | 0 |
| Penglai-T@10 | 2013-6-10 21:27 | 2.04 | 1.999E+9 | 2.014E-3 | 4.52 | 0.18 | 1654 | 2648 | 34 | 33 | 62 | 0 |
| Penglai-L@1  | 2013-6-10 19:30 | 2.09 | 2.040E+9 | 2.014E-3 | 4.41 | 0.22 | -459 | 2203 | 49 | 25 | 80 | 0 |

|               |                 |      |          |          |      |      |      |       |    |     |    |   |
|---------------|-----------------|------|----------|----------|------|------|------|-------|----|-----|----|---|
| Penglai-L@2   | 2013-6-10 19:33 | 2.08 | 2.031E+9 | 2.015E-3 | 4.73 | 0.16 | -464 | 2095  | 49 | 25  | 80 | 0 |
| Penglai-L@3   | 2013-6-10 19:36 | 2.07 | 2.020E+9 | 2.015E-3 | 4.75 | 0.16 | -468 | 1998  | 49 | 24  | 82 | 0 |
| Penglai-L@4   | 2013-6-10 19:39 | 2.06 | 2.024E+9 | 2.015E-3 | 4.79 | 0.15 | -469 | 1896  | 49 | 25  | 80 | 0 |
| Penglai-L@5   | 2013-6-10 19:41 | 2.06 | 2.015E+9 | 2.015E-3 | 4.66 | 0.18 | -470 | 1784  | 48 | 23  | 81 | 0 |
| Penglai-L@6   | 2013-6-10 20:33 | 2.14 | 2.083E+9 | 2.015E-3 | 4.88 | 0.16 | -472 | 1684  | 47 | 23  | 81 | 0 |
| Penglai-L@7   | 2013-6-10 20:36 | 2.12 | 2.080E+9 | 2.015E-3 | 4.91 | 0.18 | -473 | 1590  | 47 | 22  | 80 | 0 |
| Penglai-L@8   | 2013-6-10 20:39 | 2.11 | 2.082E+9 | 2.015E-3 | 4.82 | 0.17 | -473 | 1492  | 46 | 21  | 79 | 0 |
| Penglai-L@9   | 2013-6-10 20:42 | 2.11 | 2.074E+9 | 2.015E-3 | 4.77 | 0.16 | -476 | 1395  | 46 | 20  | 80 | 0 |
| Penglai-L@10  | 2013-6-10 20:45 | 2.09 | 2.067E+9 | 2.015E-3 | 4.73 | 0.19 | -474 | 1273  | 46 | 19  | 81 | 0 |
| Penglai-R@1   | 2013-6-10 20:03 | 2.09 | 2.173E+9 | 2.013E-3 | 3.99 | 0.18 | 2891 | 1598  | 20 | 14  | 45 | 0 |
| Penglai-R@2   | 2013-6-10 20:06 | 2.20 | 2.201E+9 | 2.014E-3 | 4.15 | 0.18 | 2895 | 1477  | 20 | 13  | 48 | 0 |
| Penglai-R@3   | 2013-6-10 20:09 | 2.21 | 2.208E+9 | 2.014E-3 | 4.14 | 0.14 | 2922 | 1296  | 20 | 14  | 47 | 0 |
| Penglai-R@4   | 2013-6-10 20:11 | 2.22 | 2.204E+9 | 2.013E-3 | 4.08 | 0.20 | 2928 | 1172  | 19 | 10  | 47 | 0 |
| Penglai-R@5   | 2013-6-10 20:14 | 2.21 | 2.197E+9 | 2.014E-3 | 4.21 | 0.18 | 2936 | 1064  | 19 | 10  | 47 | 0 |
| Penglai-R@6   | 2013-6-10 20:48 | 2.15 | 2.128E+9 | 2.013E-3 | 4.08 | 0.20 | 2948 | 896   | 18 | 10  | 48 | 0 |
| Penglai-R@7   | 2013-6-10 20:57 | 2.12 | 2.119E+9 | 2.014E-3 | 4.27 | 0.17 | 2961 | 781   | 17 | 9   | 48 | 0 |
| Penglai-R@8   | 2013-6-10 21:00 | 2.11 | 2.109E+9 | 2.013E-3 | 4.11 | 0.21 | 2969 | 677   | 17 | 10  | 48 | 0 |
| Penglai-R@9   | 2013-6-10 21:03 | 2.11 | 2.109E+9 | 2.014E-3 | 4.34 | 0.17 | 2984 | 560   | 18 | 10  | 49 | 0 |
| Penglai-R@10  | 2013-6-10 21:06 | 2.10 | 2.110E+9 | 2.014E-3 | 4.25 | 0.16 | 3007 | 393   | 17 | 6   | 50 | 0 |
| Penglai-B@1   | 2013-6-10 19:05 | 2.14 | 2.149E+9 | 2.014E-3 | 4.20 | 0.10 | 449  | -942  | 34 | -8  | 67 | 0 |
| Penglai-B@2   | 2013-6-10 19:08 | 2.14 | 2.146E+9 | 2.014E-3 | 4.29 | 0.17 | 543  | -953  | 35 | -7  | 68 | 0 |
| Penglai-B@3   | 2013-6-10 19:11 | 2.13 | 2.142E+9 | 2.014E-3 | 4.18 | 0.16 | 677  | -988  | 34 | -8  | 67 | 0 |
| Penglai-B@4   | 2013-6-10 19:50 | 2.20 | 2.219E+9 | 2.014E-3 | 4.60 | 0.18 | 769  | -1001 | 32 | -9  | 67 | 0 |
| Penglai-B@5   | 2013-6-10 20:00 | 2.06 | 2.084E+9 | 2.014E-3 | 4.38 | 0.19 | 882  | -1016 | 32 | -9  | 67 | 0 |
| Penglai-B@6   | 2013-6-10 20:17 | 2.17 | 2.194E+9 | 2.014E-3 | 4.25 | 0.16 | 976  | -1022 | 32 | -10 | 66 | 0 |
| Penglai-B@7   | 2013-6-10 20:27 | 2.15 | 2.186E+9 | 2.014E-3 | 4.57 | 0.17 | 1162 | -1037 | 31 | -7  | 64 | 0 |
| Penglai-B@8   | 2013-6-10 20:30 | 2.15 | 2.184E+9 | 2.014E-3 | 4.22 | 0.14 | 1261 | -1038 | 29 | -9  | 64 | 0 |
| Penglai-B@9   | 2013-6-10 21:30 | 2.03 | 2.069E+9 | 2.014E-3 | 4.32 | 0.28 | 1711 | -945  | 26 | -5  | 60 | 0 |
| Penglai-B@10  | 2013-6-10 21:33 | 2.01 | 2.060E+9 | 2.014E-3 | 4.51 | 0.20 | 2070 | -915  | 24 | -7  | 61 | 0 |
| Penglai-L-R@1 | 2013-6-10 21:55 | 2.13 | 2.123E+9 | 2.015E-3 | 4.70 | 0.21 | -386 | 1542  | 42 | 18  | 75 | 0 |

|                |                 |      |          |          |      |      |      |      |    |    |    |   |
|----------------|-----------------|------|----------|----------|------|------|------|------|----|----|----|---|
| Penglai-L-R@2  | 2013-6-10 21:57 | 2.13 | 2.131E+9 | 2.015E-3 | 4.67 | 0.14 | -246 | 1542 | 41 | 22 | 72 | 0 |
| Penglai-L-R@3  | 2013-6-10 22:00 | 2.14 | 2.133E+9 | 2.014E-3 | 4.46 | 0.14 | -106 | 1542 | 39 | 22 | 72 | 0 |
| Penglai-L-R@4  | 2013-6-10 22:03 | 2.15 | 2.131E+9 | 2.014E-3 | 4.63 | 0.14 | 34   | 1542 | 37 | 21 | 70 | 0 |
| Penglai-L-R@5  | 2013-6-10 22:06 | 2.14 | 2.132E+9 | 2.014E-3 | 4.45 | 0.15 | 174  | 1542 | 35 | 21 | 69 | 0 |
| Penglai-L-R@6  | 2013-6-10 22:09 | 2.14 | 2.128E+9 | 2.014E-3 | 4.47 | 0.17 | 314  | 1542 | 34 | 22 | 68 | 0 |
| Penglai-L-R@7  | 2013-6-10 22:12 | 2.14 | 2.131E+9 | 2.014E-3 | 4.50 | 0.23 | 454  | 1542 | 32 | 20 | 68 | 0 |
| Penglai-L-R@8  | 2013-6-10 22:15 | 2.13 | 2.126E+9 | 2.015E-3 | 4.68 | 0.17 | 594  | 1542 | 31 | 19 | 67 | 0 |
| Penglai-L-R@9  | 2013-6-10 22:25 | 2.11 | 2.107E+9 | 2.014E-3 | 4.46 | 0.17 | 734  | 1542 | 29 | 20 | 66 | 0 |
| Penglai-L-R@10 | 2013-6-10 22:28 | 2.11 | 2.110E+9 | 2.014E-3 | 4.57 | 0.18 | 874  | 1542 | 28 | 20 | 65 | 0 |
| Penglai-L-R@11 | 2013-6-10 22:31 | 2.11 | 2.107E+9 | 2.015E-3 | 4.66 | 0.18 | 1014 | 1542 | 26 | 19 | 65 | 0 |
| Penglai-L-R@12 | 2013-6-10 22:34 | 2.10 | 2.099E+9 | 2.014E-3 | 4.47 | 0.18 | 1154 | 1542 | 25 | 19 | 64 | 0 |
| Penglai-L-R@13 | 2013-6-10 22:37 | 2.09 | 2.092E+9 | 2.014E-3 | 4.46 | 0.15 | 1294 | 1542 | 25 | 20 | 63 | 0 |
| Penglai-L-R@14 | 2013-6-10 22:39 | 2.08 | 2.088E+9 | 2.015E-3 | 4.70 | 0.18 | 1434 | 1542 | 24 | 21 | 62 | 0 |
| Penglai-L-R@15 | 2013-6-10 22:42 | 2.08 | 2.084E+9 | 2.014E-3 | 4.59 | 0.16 | 1574 | 1542 | 24 | 21 | 63 | 0 |
| Penglai-L-R@16 | 2013-6-10 22:45 | 2.08 | 2.082E+9 | 2.014E-3 | 4.44 | 0.17 | 1714 | 1542 | 22 | 19 | 62 | 0 |
| Penglai-L-R@17 | 2013-6-10 22:54 | 2.07 | 2.076E+9 | 2.015E-3 | 4.68 | 0.20 | 1854 | 1542 | 21 | 17 | 61 | 0 |
| Penglai-L-R@18 | 2013-6-10 22:57 | 2.07 | 2.075E+9 | 2.014E-3 | 4.62 | 0.14 | 1994 | 1542 | 21 | 19 | 61 | 0 |
| Penglai-L-R@19 | 2013-6-10 23:00 | 2.07 | 2.071E+9 | 2.014E-3 | 4.53 | 0.18 | 2134 | 1542 | 19 | 17 | 60 | 0 |
| Penglai-L-R@20 | 2013-6-10 23:04 | 2.06 | 2.059E+9 | 2.014E-3 | 4.44 | 0.21 | 2274 | 1542 | 20 | 19 | 59 | 0 |
| Penglai-L-R@21 | 2013-6-10 23:07 | 2.05 | 2.061E+9 | 2.014E-3 | 4.42 | 0.16 | 2414 | 1542 | 19 | 16 | 59 | 0 |
| Penglai-L-R@22 | 2013-6-10 23:10 | 2.05 | 2.054E+9 | 2.014E-3 | 4.39 | 0.25 | 2554 | 1542 | 18 | 17 | 58 | 0 |
| Penglai-L-R@23 | 2013-6-10 23:13 | 2.04 | 2.050E+9 | 2.014E-3 | 4.51 | 0.23 | 2694 | 1542 | 18 | 16 | 57 | 0 |
| Penglai-L-R@24 | 2013-6-10 23:16 | 2.04 | 2.044E+9 | 2.014E-3 | 4.37 | 0.21 | 2834 | 1542 | 18 | 16 | 53 | 0 |



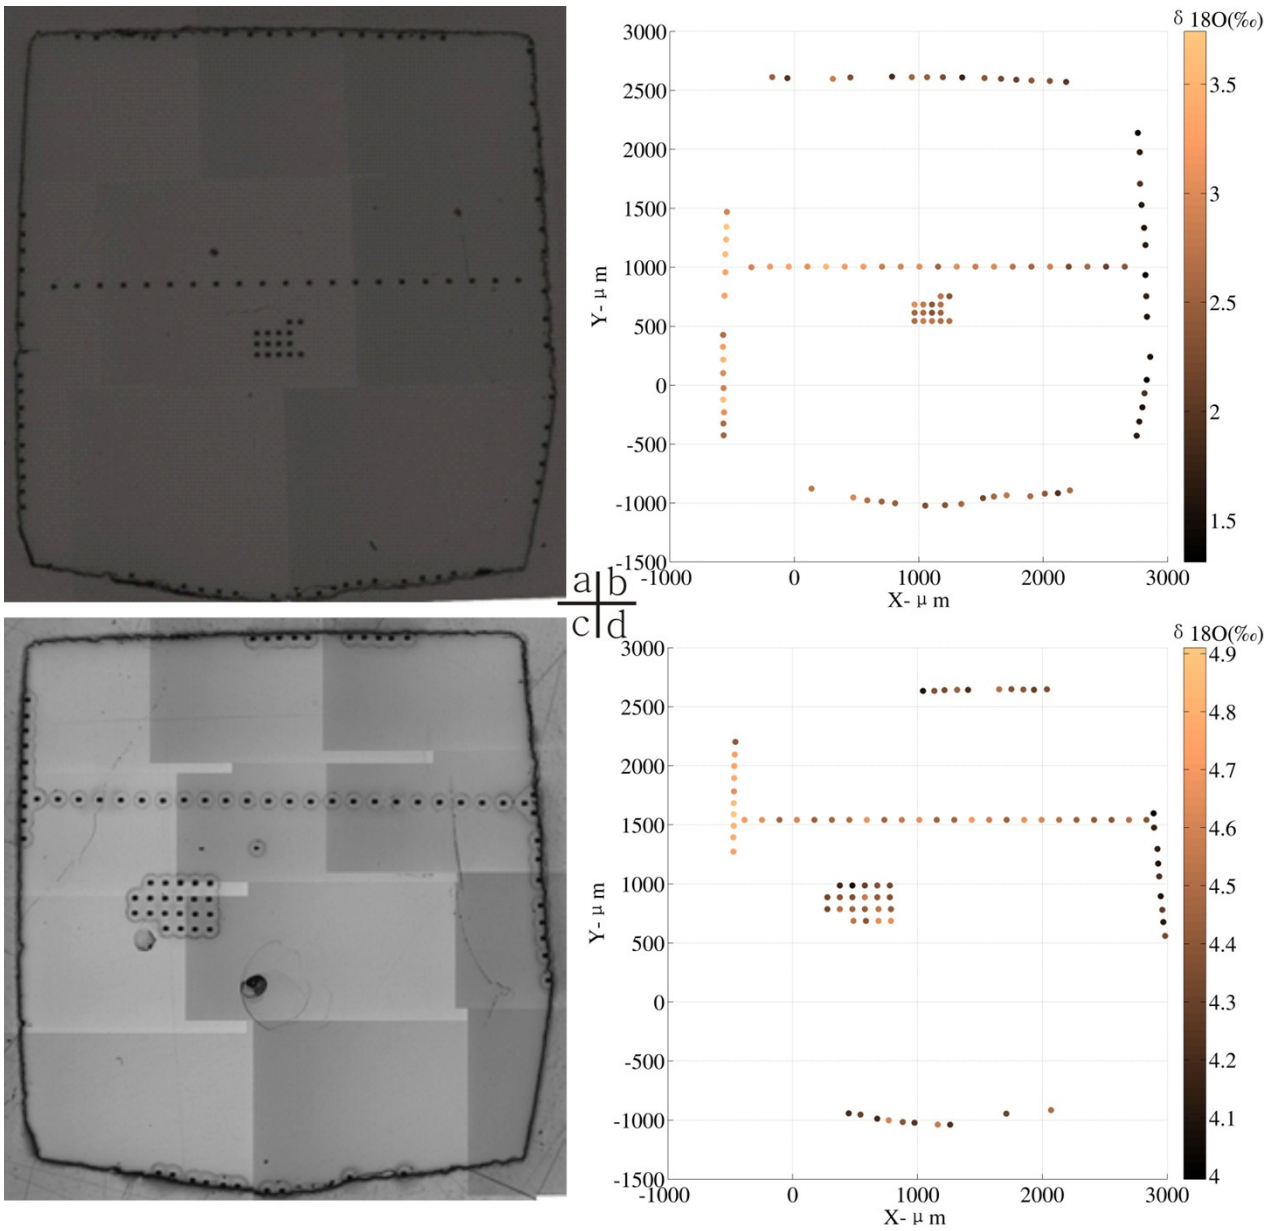

Figure 1 Microscope photos of the Penglai zircon grain after measurements and spots coordinates in SIMS instrument during session 2 and 3. Figures (a) and (c) show the photos of Penglai zircon grain after session 2 and 3, respectively. Figures (b) and (d) show the spots coordinates in SIMS instrument during session 2 and 3, respectively. Figures (a) and (c) demonstrate that the orientation of Mount B in sample holder is nearly the same in both sessions.
